# Supplementary material for: Characterization of antimicrobial resistance in chicken-source phylogroup F Escherichia coli: similar populations and resistance spectrums between E. coli recovered from chicken colibacillosis tissues and retail raw meats in Eastern China
Source: PubMed Central journal article supplement — Poult Sci. 2021 Jun 30;100(9):101370. doi: 10.1016/j.psj.2021.101370 (PMC8339308; doi:10.1016/j.psj.2021.101370), 2021-06-30
Supplement: mmc1.pdf [file mmc1.pdf]

Oligonucleotide sequences used as PCR primers.

| Targets                                     | Primers                               | Nucleotide Sequence (5'-3')                     | Fragment Size | References |
|---------------------------------------------|---------------------------------------|-------------------------------------------------|---------------|------------|
| <i>CTX-M-1</i>                              | <i>bla</i> <sub>CTX-M-group1</sub> -F | GTTACAATGTGTGAGAAGCAG                           | 1041bp        | (1, 2)     |
|                                             | <i>bla</i> <sub>CTX-M-group1</sub> -R | CCGTTTCCGCTATTACAAAC-3                          |               |            |
| <i>CTX-M-2</i>                              | <i>bla</i> <sub>CTX-M-group2</sub> -F | TGATGAGACATCGCGTTAAG                            | 875bp         | (1, 2)     |
|                                             | <i>bla</i> <sub>CTX-M-group2</sub> -R | TAACCGTCGGTGACGATTTT                            |               |            |
| <i>CTX-M-8</i>                              | <i>bla</i> <sub>CTX-M-group8</sub> -F | ATGATGAGACATCGCGTTAAG                           | 865bp         | (3)        |
|                                             | <i>bla</i> <sub>CTX-M-group8</sub> -R | CGGTGACGATTTTTCGCGGCAG                          |               |            |
| <i>CTX-M-9</i>                              | <i>bla</i> <sub>CTX-M-group9</sub> -F | ATGGTGACAAAGAGAGTGCA                            | 913bp         | (3)        |
|                                             | <i>bla</i> <sub>CTX-M-group9</sub> -R | TTACAGCCCTTCGGCGATGA                            |               |            |
| <i>TEM</i>                                  | <i>bla</i> <sub>TEM</sub> -F          | ATTCTTGAAGACGAAAGGGC                            | 1150bp        | (1, 2)     |
|                                             | <i>bla</i> <sub>TEM</sub> -R          | ACGCTCAGTGGAACGAAAAC                            |               |            |
| <i>SHV</i>                                  | <i>bla</i> <sub>SHV</sub> -F          | CACTCAAGGATGTATTGTG                             | 885bp         | (1, 2)     |
|                                             | <i>bla</i> <sub>SHV</sub> -R          | TTAGCGTTGCCAGTGCTCG                             |               |            |
| <i>OXA-1</i>                                | <i>OXA-1-F</i>                        | ACACAATACATATCAACTTCGC                          | 813bp         | (4)        |
|                                             | <i>OXA-1-R</i>                        | AGTGTGTGTTTAGAATGGTGATC                         |               |            |
| <i>OXA-2</i>                                | <i>OXA-2-F</i>                        | TTCAAGCCAAAGGCACGATAG                           | 702bp         | (5)        |
|                                             | <i>OXA-2-R</i>                        | TCCGAGTTGACTGCCGGGTTG                           |               |            |
| MOX-1, MOX-2,<br>CMY-1, CMY-8<br>to CMY-11  | MOXMF<br>MOXMR                        | GCTGCTCAAGGAGCACAGGAT<br>CACATTGACATAGGTGTGGTGC | 520bp         | (6)        |
| LAT-1 to LAT-4,<br>CMY-2 to<br>CMY-7, BIL-1 | CITMF<br>CITMR                        | TGGCCAGAACTGACAGGCAAA<br>TTTCTCCTGAACGTGGCTGGC  | 462bp         | (6)        |
| <i>DHA-1, DHA-2</i>                         | <i>DHAMF</i>                          | AACTTTCACAGGTGTGCTGGGT                          | 405bp         | (6)        |
|                                             | <i>DHAMR</i>                          | CCGTACGCATACTGGCTTTGC                           |               |            |
| <i>FOX-1 to<br/>FOX-5b</i>                  | <i>FOXMF</i>                          | AACATGGGGTATCAGGGAGATG                          | 190bp         | (6)        |
|                                             | <i>FOXMR</i>                          | CAAAGCGCGTAACCGGATTGG                           |               |            |
| <i>CMY-2</i>                                | <i>CMY-2F</i>                         | AACACACTGATTGCGTCTGAC                           | 1226bp        | (6)        |
|                                             | <i>CMY-2R</i>                         | CTGGGCCTCATCGTCAGTTA                            |               |            |
| <i>sul1</i>                                 | <i>sul1-F</i>                         | TGGTGACGGTGTTCGGCATTTC                          | 789bp         | (2, 4, 7)  |
|                                             | <i>sul1-R</i>                         | GCGAGGGTTTCCGAGAAGGTG                           |               |            |
| <i>sul2</i>                                 | <i>sul2-F</i>                         | CGGCATCGTCAACATAACC                             | 722bp         | (4, 7)     |
|                                             | <i>sul2-R</i>                         | GTGTGCGGATGAAGTCAG                              |               |            |
| <i>sul3</i>                                 | <i>sul3-F</i>                         | GAGCAAGATTTTTGGAATCG                            | 990bp         | (4, 7)     |
|                                             | <i>sul3-R</i>                         | CATCTGCAGCTAACCTAGGGCTTTGGA                     |               |            |
| <i>aadA1 or<br/>aadA2</i>                   | <i>aadA-F</i>                         | GCAGCGCAATGACATTCTTG                            | 282bp         | (4, 7)     |
|                                             | <i>aadA-R</i>                         | ATCCTTCGGCGCGATTTTG                             |               |            |
| <i>tet(A)</i>                               | <i>tet(A)-F</i>                       | GTAATTCTGAGCACTGTCCG                            | 937bp         | (4, 7)     |
|                                             | <i>tet(A)-R</i>                       | CTGTCCTGGACAACATTGCTT                           |               |            |
| <i>tet(B)</i>                               | <i>tet(B)-F</i>                       | CTCAGTATTCCAAGCCTTTG                            | 416bp         | (4, 7)     |

|                                                                           |                        |                         |       |           |
|---------------------------------------------------------------------------|------------------------|-------------------------|-------|-----------|
|                                                                           | tet(B)-R               | CTAAGCACTTGTCTCCTGTT    |       |           |
| <i>tet(C)</i>                                                             | tet(C)-F               | TCTAACAAATGCGCTCATCGT   | 570bp | (4, 7)    |
|                                                                           | tet(C)-R               | GGTTGAAGGCTCTCAAGGGC    |       |           |
| <i>aph(3')-Ia</i>                                                         | aph(3')-Ia-F           | ATGGGCTCGCGATAATGTC     | 600bp | (4, 7)    |
|                                                                           | aph(3')-Ia-R           | CTCACCGAGGCAGTTCCAT     |       |           |
| <i>aac(3)-IId</i>                                                         | AacC2-F                | ACTGTGATGGGATACGCGTC    | 237bp | (4)       |
|                                                                           | AacC2-R                | CTCCGTCAGCGTTTCAGCTA    |       |           |
| <i>aac(3)-IVa</i>                                                         | AacC4-F                | CTTCAGGATGGCAAGTTGGT    | 286bp | (4)       |
|                                                                           | AacC4-R                | TCATCTCGTTCTCCGCTCAT    |       |           |
| <i>qepA</i>                                                               | qepA-F                 | GGACATCTACGGCTTCTTCG    | 199bp | (2)       |
|                                                                           | qepA-R                 | CAACTGCTTGAGCCCGTAG     |       |           |
| <i>qnrA</i>                                                               | qnrA-F                 | AGAGGATTTCTCACGCCAGG    | 580bp | (2, 8, 9) |
|                                                                           | qnrA-R                 | TGCCAGGCACAGATCTTGAC    |       |           |
| <i>qnrB</i>                                                               | qnrB-F                 | GGMATHGAAATTCGCCACTG    | 264bp | (2, 8, 9) |
|                                                                           | qnrB-R                 | TTTGCYGYGCGCCAGTCGAA    |       |           |
| <i>qnrS</i>                                                               | qnrS-F                 | GCAAGTTCATTGAACAGGGT    | 428bp | (2, 8, 9) |
|                                                                           | qnrS-R                 | TCTAAACCGTCGAGTTCGGCG   |       |           |
| <i>aac(6')-Ib-cr</i>                                                      | <i>aac(6')-Ib-cr-F</i> | TTGCGATGCTCTATGAGTGGCTA | 482bp | (10)      |
|                                                                           | <i>aac(6')-Ib-cr-R</i> | CTCGAATGCCTGGCGTGTTT    |       |           |
| <i>strA</i>                                                               | strA-F                 | CCTGGTGATAACGGCAATTC    | 546bp | (11)      |
|                                                                           | strA-R                 | CCAATCGCAGATAGAAGGC     |       |           |
| <i>strB</i>                                                               | strB-F                 | ATCGTCAAGGGATTGAAACC    | 509bp | (11)      |
|                                                                           | strB-R                 | GGATCGTAGAACATATTGGC    |       |           |
| <i>dfrA1, dfrA5,</i><br><i>dfrA15, dfrA15b,</i><br><i>dfrA16, dfrA16b</i> | DfrIa-F                | GTGAAACTATCACTAATGG     | 474bp | (4)       |
|                                                                           | DfrIa-R                | TTAACCCCTTTTGCCAGATTT   |       |           |
| <i>dfrA14, dfrA6</i>                                                      | DfrIb-F                | GAGCAGCTICTITTTAAAGC    | 393bp | (4)       |
|                                                                           | DfrIb-R                | TTAGCCCTTTIICCAATTTT    |       |           |
| <i>dfrA7, dfrA17</i>                                                      | DfrVII-F               | TTGAAAATTTTCATTGATT     | 474bp | (4)       |
|                                                                           | DfrVII-R               | TTAGCCTTTTTTCCAAATCT    |       |           |
| <i>dfrA12, dfrA13</i>                                                     | DfrXII-F               | GGTGCGCAGAAGATTTTTTCGC  | 319bp | (4)       |
|                                                                           | DfrXII-R               | TGGGAAGAAGGCGTCACCCTC   |       |           |
| <i>cmlA</i>                                                               | CmlA-F                 | TGTCATTTACGGCATACTCG    | 455bp | (4)       |
|                                                                           | CmlA-R                 | ATCAGGCATCCCATTCCCAT    |       |           |
| <i>floR</i>                                                               | FloR1                  | CACGTTGAGCCTCTATAT      | 868bp | (4)       |
|                                                                           | FloR2                  | ATGCAGAAGTAGAACGCG      |       |           |
| <i>intl1</i>                                                              | <i>intl1-F</i>         | CACTCCGGCACCGCCAACCTTC  | 545bp | (12)      |
|                                                                           | <i>intl1-R</i>         | GAACGGGCATGCGGATCAGTGAG |       |           |
| <i>mcr-1</i>                                                              | <i>mcr1_320bp_fw</i>   | AGTCCGTTTTGTTCTTGTGGC   | 320bp | (13)      |
|                                                                           | <i>mcr1_320bp_rev</i>  | AGATCCTTGGTCTCGGCTTG    |       |           |
| <i>mcr-2</i>                                                              | <i>mcr2_700bp_fw</i>   | CAAGTGTGTTGGTCGCAGTT    | 715bp | (13)      |
|                                                                           | <i>mcr2_700bp_rev</i>  | TCTAGCCCGACAAGCATAACC   |       |           |
| <i>mcr-3</i>                                                              | <i>mcr3_900bp_fw</i>   | AAATAAAAATTGTTCCGCTTATG | 929bp | (13)      |
|                                                                           | <i>mcr3_900bp_rev</i>  | AATGGAGATCCCCGTTTTT     |       |           |

|              |                 |                        |        |      |
|--------------|-----------------|------------------------|--------|------|
| <i>mcr-4</i> | mcr4_1100bp_fw  | TCACTTTCATCACTGCGTTG   | 1116bp | (13) |
|              | mcr4_1100bp_rev | TTGGTCCATGACTACCAATG   |        |      |
| <i>mcr-5</i> | MCR5_FW         | ATGCGGTTGTCTGCATTTATC  | 1644bp | (14) |
|              | MCR5_RV         | TCATTGTGGTTGTCCTTTTCTG |        |      |

## References

- Jouini A, Vinue L, Ben Slama K, Saenz Y, Klibi N, Hammami S, Boudabous A, Torres C. 2007. Characterization of CTX-M and SHV extended-spectrum beta-lactamases and associated resistance genes in *Escherichia coli* strains of food samples in Tunisia. *Journal of Antimicrobial Chemotherapy* 60:1137-1141.
- Badi S, Cremonesi P, Abbassi MS, Ibrahim C, Snoussi M, Bignoli G, Luini M, Castiglioni B, Hassen A. 2018. Antibiotic resistance phenotypes and virulence-associated genes in *Escherichia coli* isolated from animals and animal food products in Tunisia. *FEMS Microbiol Lett* 365.
- Hayashi W, Ohsaki Y, Taniguchi Y, Koide S, Kawamura K, Suzuki M, Kimura K, Wachino J, Nagano Y, Arakawa Y, Nagano N. 2018. High prevalence of bla(CTX-M-14) among genetically diverse *Escherichia coli* recovered from retail raw chicken meat portions in Japan. *International Journal of Food Microbiology* 284:98-104.
- Saenz Y, Brinas L, Dominguez E, Ruiz J, Zarazaga M, Vila J, Torres C. 2004. Mechanisms of resistance in multiple-antibiotic-resistant *Escherichia coli* strains of human, animal, and food origins. *Antimicrobial Agents and Chemotherapy* 48:3996-4001.
- Brinas L, Zarazaga M, Saenz Y, Ruiz-Larrea F, Torres C. 2002. beta-lactamases in ampicillin-resistant *Escherichia coli* isolates from foods, humans, and healthy animals. *Antimicrobial Agents and Chemotherapy* 46:3156-3163.
- Perez-Perez FJ, Hanson ND. 2002. Detection of plasmid-mediated AmpC beta-lactamase genes in clinical isolates by using multiplex PCR. *Journal of Clinical Microbiology* 40:2153-2162.
- Saenz Y, Vinue L, Ruiz E, Somalo S, Martinez S, Rojo-Bezares B, Zarazaga M, Torres C. 2010. Class 1 integrons lacking qacE Delta 1 and sul1 genes in *Escherichia coli* isolates of food, animal and human origins. *Veterinary Microbiology* 144:493-497.
- Cattoir V, Poirel L, Rotimi V, Soussy CJ, Nordmann P. 2007. Updated qnr multiplex PCR-based technique: epidemiological survey of Qnr determinants in a collection of ESBL-producing enterobacterial isolates from Kuwait. *International Journal of Antimicrobial Agents* 29:S133-S133.
- Cattoir V, Poirel L, Rotimi V, Soussy CJ, Nordmann P. 2007. Multiplex PCR for detection of plasmid-mediated quinolone resistance qnr genes in ESBL-producing enterobacterial isolates. *Journal of Antimicrobial Chemotherapy* 60:394-397.
- Robicsek A, Strahilevitz J, Sahm DF, Jacoby GA, Hooper DC. 2006. qnr Prevalence in ceftazidime-resistant Enterobacteriaceae isolates from the United States. *Antimicrobial Agents and Chemotherapy* 50:2872-2874.
- Boerlin P, Travis R, Gyles CL, Reid-Smith R, Janecko N, Lim H, Nicholson V, McEwen SA, Friendship R, Archambault M. 2005. Antimicrobial resistance and virulence genes of *Escherichia coli* isolates from swine in Ontario. *Applied and Environmental Microbiology*

71:6753-6761.

12. Johnson TJ, Logue CM, Johnson JR, Kuskowski MA, Sherwood JS, Barnes HJ, DebRoy C, Wannemuehler YM, Obata-Yasuoka M, Spanjaard L, Nolan LK. 2012. Associations between multidrug resistance, plasmid content, and virulence potential among extraintestinal pathogenic and commensal *Escherichia coli* from humans and poultry. *Foodborne Pathog Dis* 9:37-46.
13. Rebelo AR, Bortolaia V, Kjeldgaard JS, Pedersen SK, Leekitcharoenphon P, Hansen IM, Guerra B, Malorny B, Borowiak M, Hammerl JA, Battisti A, Franco A, Alba P, Perrin-Guyomard A, Granier SA, De Frutos Escobar C, Malhotra-Kumar S, Villa L, Carattoli A, Hendriksen RS. 2018. Multiplex PCR for detection of plasmid-mediated colistin resistance determinants, *mcr-1*, *mcr-2*, *mcr-3*, *mcr-4* and *mcr-5* for surveillance purposes. *Euro Surveill* 23.
14. Borowiak M, Fischer J, Hammerl JA, Hendriksen RS, Szabo I, Malorny B. 2017. Identification of a novel transposon-associated phosphoethanolamine transferase gene, *mcr-5*, conferring colistin resistance in d-tartrate fermenting *Salmonella enterica* subsp *enterica* serovar Paratyphi B. *Journal of Antimicrobial Chemotherapy* 72:3317-3324.
